# Supplementary material for: Trends and correlates of meeting 24-hour movement guidelines: a 15-year study among 167,577 Thai adults
Source: PubMed Central journal article supplement (PMC7446156; doi:10.1186/s12966-020-01011-9), 2020-08-24
Supplement: 12966_2020_1011_MOESM1_ESM.pdf [file 12966_2020_1011_MOESM1_ESM.pdf]

**Meeting the moderate-to-vigorous physical activity guideline for additional health benefits:  
population prevalence and associations with sociodemographic variables**

| Meeting Enhance<br>MVPA Guidelines | Prevalence (95% CI)   |                       |                       |                        |         | Adjusted OR (95% CI)  |                       |                       |                       |         |
|------------------------------------|-----------------------|-----------------------|-----------------------|------------------------|---------|-----------------------|-----------------------|-----------------------|-----------------------|---------|
|                                    | 2001                  | 2004                  | 2009                  | 2015                   | P-value | 2001                  | 2004                  | 2009                  | 2015                  | P-value |
| <b>Total (n)</b>                   | 66.7<br>(66.3 - 67.2) | 82.7<br>(82.3 - 83.0) | 81.0<br>(80.6 - 81.3) | 74.3<br>(73.9 - 74.7)  | 0.152** |                       |                       |                       |                       |         |
| <b>Sex (%)</b>                     |                       |                       |                       |                        |         |                       |                       |                       |                       |         |
| Male                               | 69.3<br>(68.7 - 70.0) | 85.3<br>(84.8 - 85.8) | 84.4<br>(83.9 - 84.9) | 77.6<br>(77.1 - 78.15) | 0.095** |                       |                       |                       |                       |         |
| Female                             | 64.1<br>(63.5 - 64.8) | 80.0<br>(79.4 - 80.5) | 77.7<br>(77.1 - 78.2) | 71.1<br>(70.5 - 71.7)  | 0.827*  | 0.85<br>(0.81 - 0.89) | 0.8<br>(0.76 - 0.85)  | 0.7<br>(0.67 - 0.74)  | 0.75<br>(0.72 - 0.79) | 0.5308* |
| <b>Age (%)</b>                     |                       |                       |                       |                        |         |                       |                       |                       |                       |         |
| 18 - 29                            | 60.6<br>(59.8 - 61.4) | 78.4<br>(77.7 - 79.1) | 75.5<br>(74.8 - 76.2) | 69.98<br>(68.2 - 69.8) | 0.791*  | Ref                   |                       |                       |                       |         |
| 30 - 39                            | 67.6<br>(66.7 - 68.5) | 83.4<br>(82.7 - 84.1) | 79.7<br>(79.0 - 80.5) | 72.2<br>(71.4 - 73.0)  | 0.994*  | 1.20<br>(1.13 - 1.28) | 1.13<br>(1.04 - 1.22) | 1.19<br>(1.12 - 1.28) | 1.04<br>(0.98 - 1.11) | 0.617*  |
| 40 - 49                            | 70.7<br>(69.7 - 71.6) | 86.8<br>(86.1 - 87.5) | 85.4<br>(84.8 - 86.0) | 77.84<br>(77.1 - 78.6) | 0.112** | 1.30<br>(1.21 - 1.39) | 1.49<br>(1.37 - 1.63) | 1.72<br>(1.60 - 1.86) | 1.26<br>(1.18 - 1.34) | 0.897*  |
| 50 - 59                            | 74.1<br>(72.9 - 75.2) | 84.7<br>(83.8 - 85.7) | 85.3<br>(84.6 - 86.0) | 79.0<br>(78.2 - 79.8)  | 0.005** | 1.54<br>(1.42 - 1.67) | 1.32<br>(1.20 - 1.46) | 1.79<br>(1.65 - 1.95) | 1.32<br>(1.23 - 1.42) | 0.787*  |
| <b>Household area (%)</b>          |                       |                       |                       |                        |         |                       |                       |                       |                       |         |
| Urban                              | 48.2<br>(47.3 - 49.1) | 73.8<br>(73.0 - 74.5) | 73.7<br>(73.0 - 74.4) | 68.8<br>(68.2 - 69.4)  | 0.094** | Ref                   |                       |                       |                       |         |
| Rural                              | 75.7<br>(75.2 - 76.2) | 87.3<br>(86.9 - 87.7) | 84.4<br>(84.0 - 84.8) | 79.1<br>(78.6 - 79.7)  | 0.988*  | 2.09<br>(1.98 - 2.21) | 1.54<br>(1.44 - 1.66) | 1.35<br>(1.27 - 1.43) | 1.27<br>(1.21 - 1.34) | 0.039*  |
| <b>Region (%)</b>                  |                       |                       |                       |                        |         |                       |                       |                       |                       |         |
| Bangkok                            | 40.3<br>(38.8 - 41.7) | 65.8<br>(64.5 - 67.1) | 64.4<br>(63.0 - 65.7) | 59.8<br>(58.6 - 60.9)  | 0.157** | Ref                   |                       |                       |                       |         |
| Central                            | 59.4<br>(58.3 - 60.4) | 79.2<br>(78.4 - 80.1) | 75.9<br>(75.1 - 76.7) | 70.1<br>(69.4 - 70.9)  | 0.719*  | 1.18<br>(1.08 - 1.28) | 1.41<br>(1.29 - 1.54) | 1.50<br>(1.38 - 1.63) | 1.37<br>(1.28 - 1.47) | 0.646*  |
| North                              | 73.6<br>(72.6 - 74.6) | 88.5<br>(87.8 - 89.3) | 87.0<br>(86.3 - 87.7) | 82.4<br>(81.6 - 83.3)  | 0.211** | 1.88<br>(1.71 - 2.06) | 2.68<br>(2.40 - 2.99) | 3.04<br>(2.76 - 3.36) | 2.65<br>(2.44 - 2.88) | 0.302*  |
| North-east                         | 77.3<br>(76.5 - 78.0) | 87.9<br>(87.3 - 88.5) | 85.2<br>(84.7 - 85.8) | 79.9<br>(79.2 - 80.7)  | 0.947*  | 2.28<br>(2.09 - 2.48) | 2.39<br>(2.16 - 2.64) | 2.67<br>(2.44 - 2.92) | 2.21<br>(2.05 - 2.39) | 0.937*  |
| South                              | 67.9<br>(66.5 - 69.2) | 86.1<br>(85.1 - 87.1) | 84.6<br>(83.7 - 85.5) | 79.6<br>(78.4 - 80.5)  | 0.177** | 1.46<br>(1.32 - 1.61) | 2.07<br>(1.83 - 2.33) | 2.55<br>(2.30 - 2.83) | 2.14<br>(1.96 - 2.33) | 0.240*  |
| <b>Marital status (%)</b>          |                       |                       |                       |                        |         |                       |                       |                       |                       |         |
| Never married                      | 58.2<br>(57.2 - 59.2) | 76.8<br>(76.0 - 77.7) | 75.6<br>(74.8 - 76.4) | 69.1<br>(68.3 - 69.9)  | 0.129** | Ref                   |                       |                       |                       |         |
| Married                            | 70.0<br>(69.4 - 70.6) | 84.9<br>(84.4 - 85.3) | 82.7<br>(82.3 - 83.1) | 76.5<br>(76.0 - 77.0)  | 0.210** | 0.94<br>(0.88 - 0.99) | 1.08<br>(1.01 - 1.16) | 1.06<br>(0.99 - 1.12) | 1.05<br>(1.00 - 1.11) | 0.724*  |

| Meeting Enhance<br>MVPA Guidelines | Prevalence (95% CI)   |                       |                       |                       |         | Adjusted OR (95% CI)  |                       |                       |                       |         |
|------------------------------------|-----------------------|-----------------------|-----------------------|-----------------------|---------|-----------------------|-----------------------|-----------------------|-----------------------|---------|
|                                    | 2001                  | 2004                  | 2009                  | 2015                  | P-value | 2001                  | 2004                  | 2009                  | 2015                  | P-value |
| Formerly married                   | 63.8<br>(61.8 - 65.8) | 81.0<br>(79.4 - 82.7) | 81.7<br>(80.4 - 83.1) | 74.5<br>(73.1 - 75.9) | 0.021** | 0.72<br>(0.64 - 0.81) | 0.89<br>(0.78 - 1.02) | 1.05<br>(0.94 - 1.18) | 0.95<br>(0.87 - 1.04) | 0.399*  |
| <b>Religion (%)</b>                |                       |                       |                       |                       |         | Ref                   |                       |                       |                       |         |
| Buddhist                           | 66.4<br>(66.0 - 66.9) | 82.5<br>(82.1 - 82.9) | 80.8<br>(80.5 - 81.2) | 74.1<br>(73.7 - 74.5) | 0.152** |                       |                       |                       |                       |         |
| non-Buddhist                       | 72.5<br>(70.5 - 74.6) | 85.4<br>(83.8 - 87.1) | 84.0<br>(82.4 - 85.5) | 78.4<br>(76.7 - 80.1) | 0.156** | 1.43<br>(1.27 - 1.60) | 1.17<br>(1.01 - 1.37) | 1.29<br>(1.14 - 1.46) | 1.17<br>(1.04 - 1.31) | 0.656*  |
| <b>Employment status (%)</b>       |                       |                       |                       |                       |         | Ref                   |                       |                       |                       |         |
| Employed                           | 69.5<br>(69.0 - 70.0) | 86.1<br>(85.7 - 86.4) | 83.6<br>(83.3 - 84.0) | 76.7<br>(76.3 - 77.1) | 0.213** |                       |                       |                       |                       |         |
| Unemployed                         | 53.8<br>(52.5 - 55.0) | 66.7<br>(65.6 - 67.8) | 67.9<br>(66.9 - 69.0) | 64.0<br>(63.1 - 65.0) | 0.390*  | 0.59<br>(0.55 - 0.62) | 0.38<br>(0.36 - 0.41) | 0.48<br>(0.46 - 0.51) | 0.57<br>(0.54 - 0.60) | 0.740*  |
| <b>Highest education level (%)</b> |                       |                       |                       |                       |         | Ref                   |                       |                       |                       |         |
| None                               | 74.2<br>(71.7 - 76.6) | 80.1<br>(77.8 - 82.4) | 77.8<br>(76.0 - 79.6) | 70.6<br>(69.3 - 71.9) | 0.391*  |                       |                       |                       |                       |         |
| Primary                            | 75.5<br>(75.0 - 76.1) | 86.4<br>(86.0 - 86.9) | 84.5<br>(84.0 - 85.0) | 80.6<br>(80.0 - 81.2) | 0.816*  | 1.01<br>(0.88 - 1.16) | 1.36<br>(1.16 - 1.59) | 1.32<br>(1.18 - 1.48) | 1.51<br>(1.4 - 1.63)  | 0.288*  |
| Secondary                          | 54.8<br>(53.8 - 55.8) | 78.4<br>(77.6 - 79.2) | 78.3<br>(77.6 - 79.0) | 72.3<br>(71.6 - 73.1) | 0.084** | 0.57<br>(0.49 - 0.65) | 1.22<br>(1.03 - 1.43) | 1.25<br>(1.11 - 1.41) | 1.18<br>(1.09 - 1.27) | 0.069** |
| Higher education                   | 44.1<br>(42.6 - 45.6) | 77.1<br>(75.9 - 78.3) | 76.5<br>(75.6 - 77.4) | 69.0<br>(68.2 - 69.9) | 0.108** | 0.39<br>(0.33 - 0.45) | 1.08<br>(0.91 - 1.28) | 1.31<br>(1.16 - 1.48) | 1.21<br>(1.12 - 1.31) | 0.004** |
| Unspecified                        | 52.6<br>(41.7 - 63.4) | 68.2<br>(60.0 - 76.4) | 80.1<br>(72.8 - 87.5) | 63.3<br>(57.2 - 69.3) | 0.001** | 0.58<br>(0.36 - 0.94) | 0.87<br>(0.57 - 1.34) | 1.29<br>(0.81 - 2.14) | 0.82<br>(0.63 - 1.08) | 0.677*  |

Legend: CI = confidence interval; OR = odds ratio adjusted for all other variables in the table; ref = reference group; \* = linear model; \*\* = quadratic model
